# Supplementary material for: Co-irradiation induced graft polymerization of pre-swollen polyacrylonitrile nanofiber membranes for uranium extraction from seawater
Source: Royal Society of Chemistry journal article supplement (doi:10.1039/d4ta08239g), 2025-01-01
Supplement: d4ta08239g1.pdf [file d4ta08239g1.pdf]

## Supplementary Information

# Co-irradiation induced graft polymerization of pre-swollen polyacrylonitrile nanofiber membrane for Uranium Extraction from Seawater

Ying Wu <sup>a,†</sup>, Yunyou Yao <sup>a,†</sup>, Zhenjie Ding <sup>b</sup>, Jixiang Li <sup>c</sup>, Tao Han <sup>a</sup>, Jianzhong Gu <sup>a</sup>,  
Yan Song <sup>d</sup>, Ziming Li <sup>d</sup>, Lu Xu <sup>e,\*</sup>, Shusen Chen <sup>d,\*</sup>, Hongjuan Ma <sup>a,\*</sup>

a. Shanghai Applied Radiation Institute, School of Environmental and Chemical Engineering, Shanghai University, Shanghai, 200444, China.

b. Eighth Research Institute of Nuclear Industry, Shanghai, China, Shanghai, 201899, China.

c. Shanghai Advanced Research Institute, Chinese Academy of Sciences, Shanghai, 200120, China.

d. Beijing Research Institute of Chemical Engineering and Metallurgy, CNNC Key Laboratory on Uranium Extraction from Seawater, Beijing, 101149, China.

e. Shanghai Institute of Applied Physics, Chinese Academy of Sciences, Shanghai 201800, China.

\* Corresponding author:

Lu Xu: [xulu@sinap.ac.cn](mailto:xulu@sinap.ac.cn);

Shusen Chen: [samcss@163.com](mailto:samcss@163.com)

Hongjuan Ma: [hongjuanma@shu.edu.cn](mailto:hongjuanma@shu.edu.cn)

---

† These authors contributed equally to this work.

\* Corresponding authors.

E-mail addresses: [xulu@sinap.ac.cn](mailto:xulu@sinap.ac.cn) (L. Xu), [samcss@163.com](mailto:samcss@163.com) (S.Chen), [hongjuanma@shu.edu.cn](mailto:hongjuanma@shu.edu.cn) (H. Ma).

# 1 **1. Experimental section**

## 2 **1.1 Characterization methods**

3 Fourier-transform infrared (FT-IR) spectra were collected on a Nicolet Avatar 370  
4 FTIR spectrometer (Thermo Nicolet Company, USA) in attenuated total reflectance  
5 mode with a resolution of  $4\text{ cm}^{-1}$  and 16 scans. The elemental composition and chemical  
6 states of the membranes were analyzed by X-ray photoelectron spectroscopy (XPS)  
7 using a Thermo SCIENTIFIC ESCALAB 250Xi instrument. The XPS data were  
8 acquired through wide scans ranging from 0 to 1300 eV.

9 TGA was performed (NETZSCH, TG209, F3) in the temperature range from 25  
10 to  $800^{\circ}\text{C}$  with a heating rate of  $10^{\circ}\text{C}$  per minute under a nitrogen flow. Mechanical  
11 tests were conducted on a universal material testing machine (TIDJ-1000, Suzhou Zhuo  
12 Xu Precision Industry Co. Ltd., China). Nitrogen adsorption–desorption isotherms were  
13 measured by a surface aperture adsorption instrument (ASAP2010C, Micromeritics).  
14 The specific surface areas of the samples were calculated using Brunauer–Emmett–  
15 Teller (BET) method within a relative pressure ( $P/P_0$ ) range of 0.0–1.0, and the pore  
16 size distribution were calculated by the Barret–Joyner–Halenda (BJH) algorithm.

17 The surface and cross-sectional morphologies of the membrane samples and the  
18 energy dispersive spectroscopy (EDS) analysis was performed using field-emission  
19 scanning electron microscopy (SEM) (JSM-6700F, JEOL, Japan). All the membranes  
20 were frozen and cracked in liquid nitrogen to investigate the original cross-section  
21 morphologies. All nanofiber membrane samples were sputtered with gold to enhance  
22 the electron conductivity before observation by SEM.

23 Contact angle experiment was used to analyze the hydrophilic and hydrophobic  
24 properties of materials by a KSV Instrument. The samples were fixed upon the  
25 specimen stage. A drop of 5  $\mu$ L distilled water was dropped onto the surface of the  
26 sample. Photographs were recorded with a NAVITAR camera to analyze the contact  
27 angle. The angle of the contact point between water droplets and the sample surface  
28 was regarded as the contact angle of the sample. Each sample was measured five times  
29 at different locations of the surface. The concentrations of U and other metals were  
30 analyzed by Inductively Coupled Plasma Mass spectrometry (ICP-MS, NexION 300D)  
31 and an Atomic Emission Spectrometer (ICP-AES, Optima 8000).

## 32 **1.2 Simulated seawater screening and reusability of HMWPAO-g-PAO** 33 **nanofiber membrane**

34 Prepare 5 L of simulated seawater for adsorption-desorption cycling experiments.  
35 Begin by accurately measuring 5 L of H<sub>2</sub>O. Sequentially add standard metal ion  
36 solutions to the H<sub>2</sub>O, including UO<sub>2</sub><sup>2+</sup>, VO<sub>3</sub><sup>-</sup>, Fe<sup>3+</sup>, Co<sup>2+</sup>, Ni<sup>2+</sup>, Cu<sup>2+</sup>, Zn<sup>2+</sup>, and Pb<sup>2+</sup>, in  
37 the following volumes: 1.65 mL, 0.75 mL, 0.5 mL, 0.025 mL, 0.50 mL, 3.0 mL, 2.0  
38 mL, and 0.015 mL, respectively. Dissolve 175 g of sea salt in the prepared solution.  
39 Next, add 0.25 g of Na<sub>2</sub>CO<sub>3</sub> to adjust the pH to approximately 8.0  $\pm$  0.1, simulating the  
40 pH of natural seawater. Subsequently, introduce approximately 0.02 g of the nanofiber  
41 membrane into the 5 L of simulated seawater. Perform the adsorption experiments at  
42 26°C with agitation at 120 rpm for 24 hours using a rotary shaker. Following the  
43 adsorption process, elute uranium and competing metal ions from the nanofiber  
44 membrane using a 0.1 M HCl solution. The elution is performed at room temperature  
45 with agitation at 100 rpm for 30 minutes using a rotary shaker. After appropriate  
46 dilution, determine the concentration of eluted uranium by Inductively Coupled Plasma  
47 Atomic Emission Spectroscopy (ICP-AES). The adsorption capacity of HMWPAO-g-  
48 PAO nanofiber membrane for metal ions is quantified using Equation. Regenerate the  
49 HMWPAO-g-PAO nanofiber membrane in a 0.4 M NaOH solution for 30 minutes.

50 After regeneration, rinse the nanofiber membrane with deionized water to remove  
51 residual NaOH, ensuring that the pH of the remaining water in the nanofiber membrane  
52 is adjusted to 7.0. Next, approximately 0.02 g of the membrane was added to 5 L of  
53 simulated seawater. The adsorption experiment was conducted on a rotary shaker at 26  
54 °C and 120 rpm for 24 h. After the adsorption, the uranium and competing metal ions  
55 loaded onto the membrane were eluted with 0.1 M HCl solution at room temperature  
56 with a rotary shaker at 100 rpm for 30 min. The concentration of the eluted uranium  
57 was analyzed by ICP-OES with an appropriate dilution.

$$58 \qquad \qquad \qquad Q = C \cdot V/M \qquad \qquad \qquad (S1)$$

59 where Q (mg/g) is the adsorption capacity of the metal ions from HMWPAO-g-  
60 PAO nanofiber membrane, C (mg/L) is the metal ion concentration measured by ICP-  
61 AES, V (L) is the eluted solution volume, and M (g) is the weight of the dried  
62 HMWPAO-g-PAO nanofiber membrane that was used. After elution, the HMWPAO-  
63 g-PAO nanofiber membrane were immersed in 0.1 M NaOH solution at room  
64 temperature for 30 min for regeneration. Then they have rinsed with deionized water  
65 until the pH of the excess water in the HMWPAO-g-PAO nanofiber membrane was  
66 neutral. The adsorbent was used for the next adsorption–desorption cycle following the  
67 same procedure described above.

### 68 **1.3 The calculation of adsorption model**

69 The solid-liquid ratio for adsorption experiments was 0.01 g of adsorbent in 1 L  
70 of uranyl solution. The adsorption experiment was conducted on a rotary shaker at 26  
71 °C and 120 rpm for 24 h. To study the mechanism of uranium adsorption, the  
72 experimental kinetic data of the HMWPAO-g-PAO nanofiber membrane for uranium  
73 adsorption were simulated using the following pseudo-first-order and pseudo-second-  
74 order models.

75 
$$\ln(Q_e - Q_t) = \ln Q_e - k_1 t \quad (S2)$$

76 
$$t/Q_t = 1/(k_2 \cdot Q_e^2) + t/Q_e \quad (S3)$$

77 where  $Q_t$  (mg/g) and  $Q_e$  (mg/g) are the uranium adsorption capacities at time  $t$  and  
78 equilibrium time, respectively;  $t$  is the contact time (h);  $k_1$  and  $k_2$  represent the kinetic  
79 rate constants of the pseudo-first-order (/h) and pseudo-second-order models,  
80 respectively (g/ (mg·h)).

81 To further clarify the uranium adsorption mechanism of the HMWPAO-g-PAO  
82 nanofiber membrane, the Langmuir and Freundlich equilibrium models were employed  
83 to fit the experimental data using eqs. (S4) and (S5), respectively:

84 
$$C_e/Q_e = C_e/Q_m + 1/(K_L \cdot Q_m) \quad (S4)$$

85 
$$\ln Q_e = \ln K_F + (1/n) \cdot \ln C_e \quad (S5)$$

86 where  $Q_e$  is the uranium adsorption capacity at equilibrium (mg/g),  $C_e$  is the  
87 equilibrium concentration of uranium (mg/L),  $Q_m$  is the maximum uranium-adsorption-  
88 capacity or saturation capacity at complete monolayer coverage (mg/g),  $K_L$  is the  
89 Langmuir adsorption constant, which represents the affinity between the adsorbates and  
90 adsorbents (L/mg), and  $K_F$  and  $n$  are the Freundlich constants characteristic of a  
91 particular adsorption isotherm (L/g).

92 **2. Supplementary Figures S1-S4**

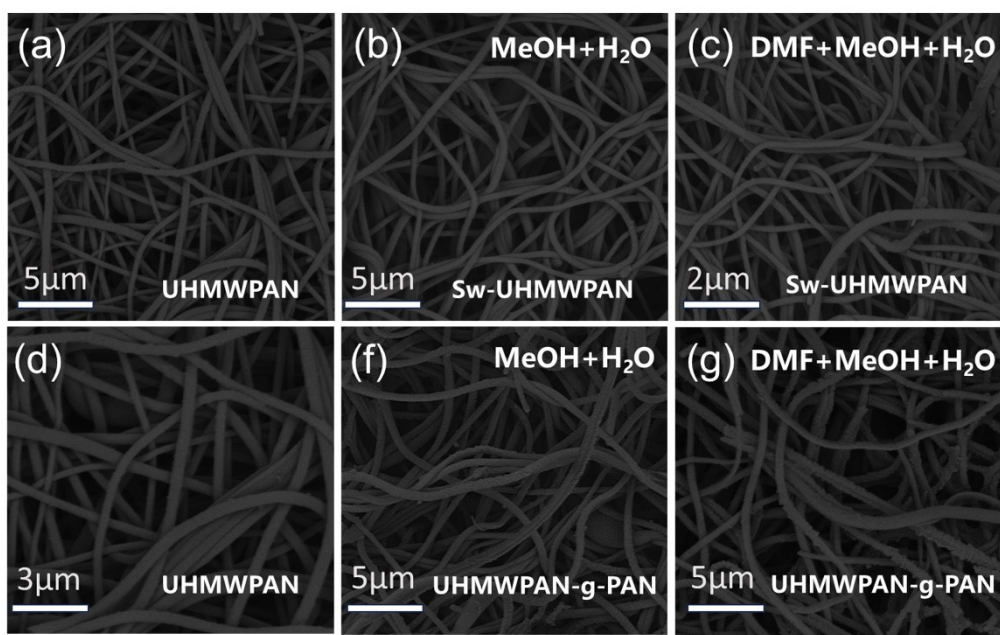

93

94 Fig. S1. SEM images of (e) HMWPAN, (f) Sw-HMWPAN, (g) HMWPAN-g-PAN, and (h)

95 HMWPAO-g-PAO.

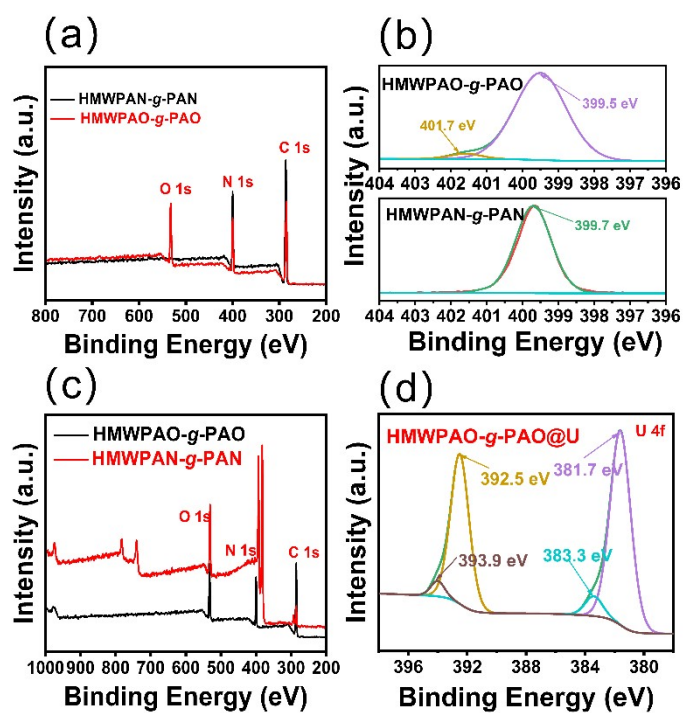

96

97 Fig. S2. Full spectrum XPS spectra of HMWPAN, HMWPAN-g-PAN, and HMWPAO-g-PAO

98 nanofiber membrane.

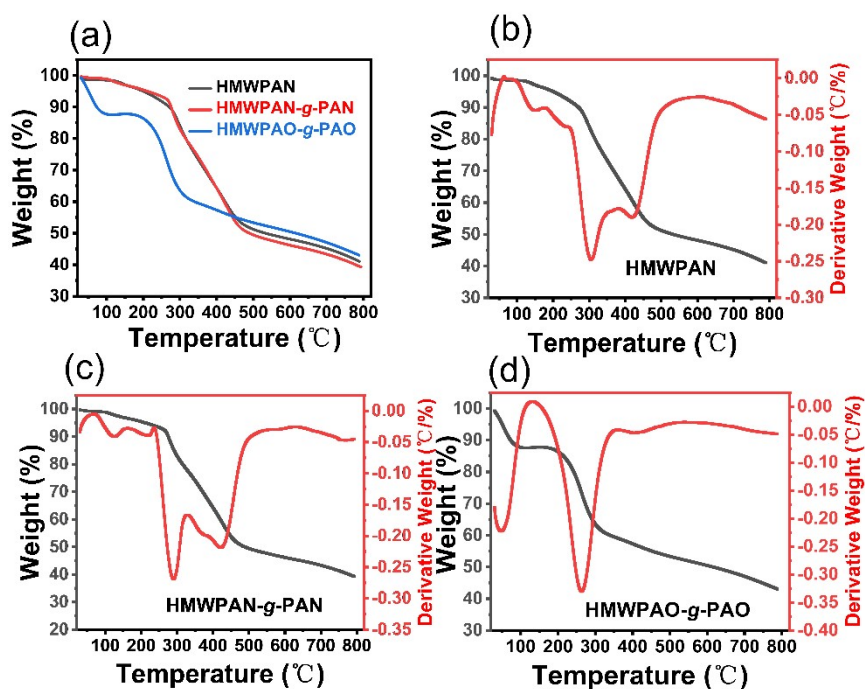

99

100 Fig. S3. TGA and DTG curves of (a) HMWPAN, (b) HMWPAN-g-PAN, (c) HMWPAO-g-PAO  
 101 nanofiber membrane in N<sub>2</sub> atmosphere.

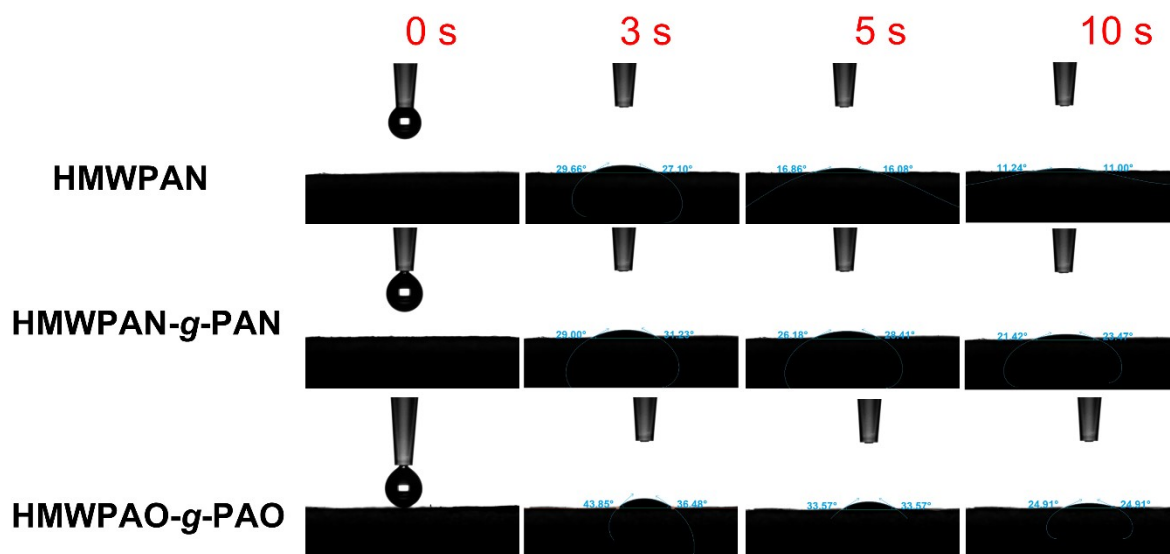

102

103 Fig. S4. HMWPAN, HMWPAN-g-PAN, and HMWPAO-g-PAO water contact angle photo of  
 104 nanofiber membrane.

### 105 3. Supplementary Tables

106 Table S1. A comparison of the tensile strength of different materials.

| Materials          | The tensile strength |  | Ref. |
|--------------------|----------------------|--|------|
|                    | MPa                  |  |      |
| This work          | $\approx 18$         |  | /    |
| PVDF/MXene         | 7.24                 |  | [41] |
| HA-PAO NFMs        | $13.6 \pm 0.9$       |  | [42] |
| PA-PAO/CS/PEO NFs  | $8.33 \pm 0.15$      |  | [43] |
| c-PVA-g-PAO NFs    | 10.39                |  | [44] |
| AO10-CPAN          | 10.6                 |  | [45] |
| PIDO NF            | 2.5                  |  | [46] |
| EVOH/MXene NFs     | 1.43                 |  | [47] |
| PAO/PAN            | 3.2                  |  | [48] |
| EVOH-g-PAO-PAA NFs | 2.24                 |  | [49] |

107

108 Table S2. A comparison of the monomer utilization ratio of various materials through radiation  
109 grafting is presented.

| Materials             | Monomer |                              | Utilization ratio | Ref. |
|-----------------------|---------|------------------------------|-------------------|------|
|                       | Name    | Density/(g/cm <sup>3</sup> ) | %                 |      |
| PP-RIGP-(PAAc-co-Pam) | AM      | 1.13                         | 0.54              | [52] |
| NWF-g-PGMA-AO         | AN/AA   | 0.806/1.051                  | 2.00              | [53] |
| PES-g-PAAc            | AA      | 1.051                        | 2.09              | [54] |
| PES-co-AMS            | AMS     | 0.909                        | 5.13              | [55] |
| PAO-AMS-A             | AMS     | 0.909                        | 12                | [56] |



|                  |    |       |       |      |
|------------------|----|-------|-------|------|
| PE-g-P(AN-co-AA) | AN | 0.806 | 14.47 | [57] |
| AO-HPE           | AN | 0.806 | 26.19 | [58] |
| DPNR-g-PAN       | AN | 0.806 | 46    | [59] |
| This work        | AN | 0.806 | 83.02 | /    |

110

111 Table S3. A comparison of adsorption capacities in natural seawater among adsorbent materials.

| Adsorbents  | Adsorption from natural seawater |         | Ref. |
|-------------|----------------------------------|---------|------|
|             | mg-U/g-ads                       | time(d) |      |
| MSF@PAO-PEI | 1.102                            | 20      | [60] |
| PP          | 1.15                             | 15      | [61] |
| PAO-Y       | 1.969                            | 15      | [62] |
| HFAO-QPEI   | 2.45                             | 21      | [63] |
| PP@MeP-H    | 3.12                             | 21      | [64] |
| PAO-PHMB-A  | 3.19                             | 30      | [65] |
| FF-PT       | 3.22                             | 30      | [66] |
| AI10-AI17   | 3.35                             | 56      | [67] |
| AF8         | 4.48                             | 56      | [68] |
| PVC-co-CPVC | 5.2                              | 49      | [69] |
| AM          | 6.03                             | 70      | [70] |
| AFM         | 7.46                             | 56      | [71] |
| This work   | 8.32                             | 50      | /    |
| CID NFs     | 11.39                            | 87      | [72] |

112

113 Table S4 Ions concentration in simulated seawater

| Element                                        | U   | V   | Fe  | Co  | Ni  | Cu | Zn  | Pb   | Mg                | Ca                |
|------------------------------------------------|-----|-----|-----|-----|-----|----|-----|------|-------------------|-------------------|
| Simulated<br>Seawater Conc.<br>in system (ppb) | 330 | 152 | 141 | 5.3 | 101 | 65 | 408 | 34.6 | $1.2 \times 10^5$ | $0.6 \times 10^5$ |

114
